# Supplementary material for: Stress Resistance of Saccharomyces cerevisiae Strains Overexpressing Yeast Polyphosphatases
Source: MDPI journal article supplement (doi:10.3390/stresses2010002), 2022-01-24
Supplement: s1 [file s1]

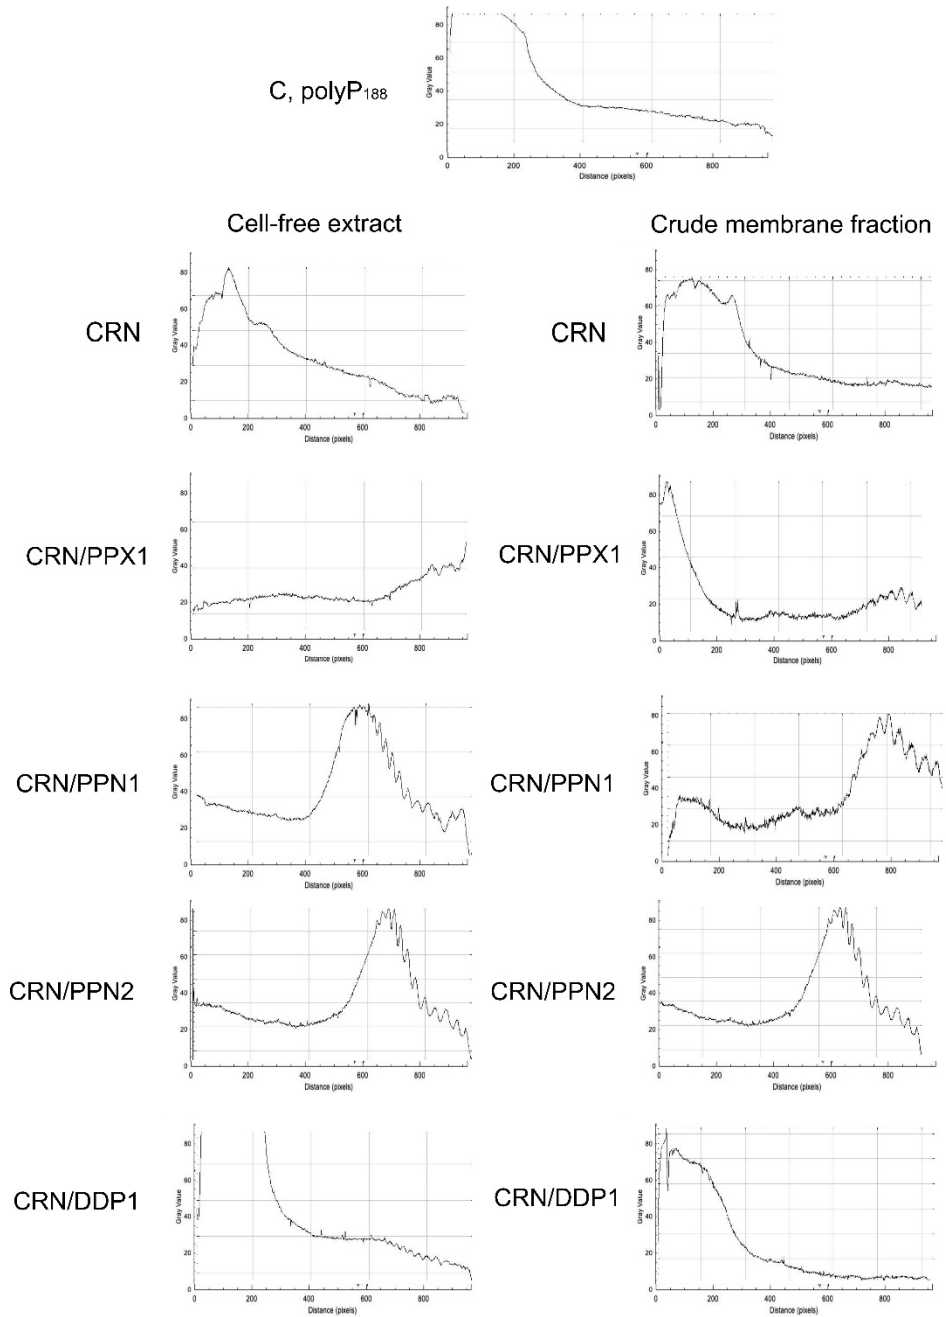

**Supplementary Figure S1.** A pixel densitometry graph of electroforegram shown in Figure 3 obtained by Image Engineering - ImageJ tool (<https://imagej.nih.gov/nih-image/more-docs/Engineering/ImgEngr.html>, accessed on 22 December 2021).

**Supplementary Table S1.** The construction of expression vectors and the genetic map of plasmids pMB1 were published earlier [33].

| Strain name      | Strain genotype                                        |
|------------------|--------------------------------------------------------|
| CRN              | <i>MATa ade2 his3 ura3 ppn1Δ::CgTRP1</i>               |
| CRN/ <i>PPN1</i> | <i>MATa ade2 his3 ura3 ppn1Δ::CgTRP1/pMB1_PPN1 Sc</i>  |
| CRN/ <i>PPN2</i> | <i>MATa ade2 his3 ura3 ppn1Δ::CgTRP1/ pMB1_PPN2 Sc</i> |
| CRN/ <i>PPX1</i> | <i>MATa ade2 his3 ura3 ppn1Δ::CgTRP1 /pMB1_PPX1 Sc</i> |
| CRN/ <i>DDP1</i> | <i>MATa ade2 his3 ura3 ppn1Δ::CgTRP1 /pMB1_DDP1 Sc</i> |

**Supplementary Table S2.** Statistical significance estimates for data shown in Figure 4. Two-tailed Student's t-test was computed in MS Excel software comparing the data from each polyphosphatase-overexpressing strain against CRN.

| <b>Cd<sup>2+</sup>, mM</b> | <b>CRN/PPN1</b> | <b>CRN/PPN2</b> | <b>CRN/PPX1</b> | <b>CRN/DDP1</b> |
|----------------------------|-----------------|-----------------|-----------------|-----------------|
| <b>0.00</b>                | 0.9918          | 0.3072          | 0.4985          | 0.3441          |
| <b>0.01</b>                | 0.0031          | 0.1895          | 0.0000          | 0.5620          |
| <b>0.02</b>                | 0.0011          | 0.0378          | 0.0089          | 0.0021          |
| <b>0.03</b>                | 0.1019          | 0.0016          | 0.0044          | 0.0067          |
| <b>0.04</b>                | 0.7733          | 0.0075          | 0.0003          | 0.0002          |
| <b>0.05</b>                | 0.0248          | 0.0025          | 0.0005          | 0.0000          |
| <b>0.1</b>                 |                 | 0.0110          |                 | 0.0051          |

| <b>KOH, mM</b> | <b>CRN/PPN1</b> | <b>CRN/PPN2</b> | <b>CRN/PPX1</b> | <b>CRN/DDP1</b> |
|----------------|-----------------|-----------------|-----------------|-----------------|
| <b>0</b>       | 0.0324          | 0.5569          | 0.0010          | 0.0011          |
| <b>10</b>      | 0.4319          | 0.4618          | 0.0013          | 0.0011          |
| <b>20</b>      | 0.1385          | 0.2060          | 0.0554          | 0.0131          |
| <b>25</b>      | 0.0024          | 0.0034          | 0.0032          | 0.0005          |
| <b>30</b>      | 0.0003          | 0.0001          | 0.0042          | 0.0004          |
| <b>40</b>      | 0.0211          | 0.0000          | 0.0009          | 0.0001          |
| <b>50</b>      | 0.0126          | 0.0009          | 0.0100          | 0.0126          |

| <b>Mn<sup>2+</sup>, mM</b> | <b>CRN/PPN1</b> | <b>CRN/PPN2</b> | <b>CRN/DDP1</b> | <b>CRN/PPX1</b> |
|----------------------------|-----------------|-----------------|-----------------|-----------------|
| <b>0</b>                   | 0.8756          | 0.0612          | 0.0018          | 0.1786          |
| <b>0.5</b>                 | 0.5827          | 0.1267          | 0.7183          | 0.2817          |
| <b>1</b>                   | 0.0211          | 0.5798          | 0.0178          | 0.8340          |
| <b>2</b>                   | 0.0068          | 0.8122          | 0.0001          | 0.1034          |
| <b>4</b>                   | 0.0072          | 0.6866          | 0.0001          | 0.0015          |
| <b>6</b>                   | 0.0006          | 0.1514          | 0.0019          | 0.1183          |

| <b>H<sub>2</sub>O<sub>2</sub>, mM</b> | <b>CRN/PPN1</b> | <b>CRN/PPN2</b> | <b>CRN/PPX1</b> | <b>CRN/DDP1</b> |
|---------------------------------------|-----------------|-----------------|-----------------|-----------------|
| <b>0</b>                              | 0.1103          | 0.0537          | 0.8629          | 0.0173          |
| <b>1</b>                              | 0.0010          | 0.1694          | 0.0016          | 0.0002          |
| <b>1.5</b>                            | 0.0112          | 0.0207          | 0.0014          | 0.0002          |
| <b>2</b>                              | 0.0000          | 0.0000          | 0.0523          | 0.0050          |
| <b>2.5</b>                            | 0.0000          | 0.0000          | 0.3829          | 0.0006          |
| <b>3</b>                              | 0.0000          | 0.0013          | 0.0007          | 0.0233          |
